1 *Review*

# 2 **A systems and treatment perspective of models of** 3 **influenza virus-induced host responses**

4 **Ericka Mochan** <sup>1,2</sup>, **Emily Ackerman** <sup>2</sup> and **Jason E. Shoemaker** <sup>2,3,4,\*</sup>

5 <sup>1</sup> Department of Mathematics, Carlow University, Pittsburgh PA 15213, USA

6 <sup>2</sup> Department of Chemical & Petroleum Engineering, University of Pittsburgh, Pittsburgh PA 15213, USA

7 <sup>3</sup> Department of Computational and Systems Biology, University of Pittsburgh, Pittsburgh PA 15213, USA

8 <sup>4</sup> McGowan Institute, University of Pittsburgh, Pittsburgh PA 15213, USA

9 \* Correspondence: [jason.shoemaker@pitt.edu](mailto:jason.shoemaker@pitt.edu)

10 Received: date; Accepted: date; Published: date

11 **Abstract:** Severe influenza infections are often characterized as having unique host responses (e.g.  
12 early, severe hypercytokinemia). Neuraminidase inhibitors can be effective in controlling the severe  
13 symptoms of influenza but are often not administered until late in the infection. Several studies  
14 suggest that immune modulation may offer protection to high risk groups. Here, we review the  
15 current state of mathematical models of influenza-induced host responses. Selecting three models  
16 with conserved immune response components, we determine if the immune system components  
17 which most affect virus replication when perturbed are conserved across the models. We also test  
18 each model's response to a pre-induction of interferon before the virus is administered. We find that  
19 each model emphasizes the importance of controlling the infected cell population to control viral  
20 replication. Moreover, our work shows that the structure of current models does not allow for  
21 significant responses to increased interferon concentrations. These results suggest that the current  
22 library of available published models of influenza infection does not adequately represent the  
23 complex interactions of the virus, interferon, and other aspects of the immune response. Specifically,  
24 the method used to model virus-resistant cells may need to be adapted in future work to more  
25 realistically represent the immune response to viral infection.

26 **Keywords:** mathematical modeling; influenza A virus; interferon pre-stimulation; sensitivity  
27 analysis; systems biology

---

## 29 **1. Introduction**

30 Influenza A virus (IAV) leads to acute respiratory disease and significant morbidity and  
31 mortality around the world each year; the World Health Organization estimates 3 to 5 million cases  
32 of severe illness and 300,000-650,000 deaths worldwide every year are caused by IAV [1]. Generally,  
33 severe outcomes are limited to high-risk patient groups, i.e. infants, aged adults, or individuals with  
34 compromised immune systems. Occasionally, however, new strains emerge with pandemic potential  
35 that can induce severe disease across a broad portion of the population. For example, the 1918 Spanish  
36 influenza pandemic is estimated to have been responsible for the death of 2% of the world's  
37 population between 1918 and 1920 [2]. Several pandemics have occurred since, including outbreaks  
38 in 1957, 1968, and 2009 [3,4]. Experts believe that avian H5N1 influenza viruses pose the greatest risk  
39 to public health. H5N1 infections have demonstrated the ability to cause severe disease in humans,  
40 including symptoms such as fever, respiratory symptoms, lymphopenia, and cytokine storm  
41 (hypercytokinemia) [5-7]. Cytokine storm occurs when the host experiences out-of-control pro-  
42 inflammatory responses and insufficient anti-inflammatory responses to infection. This is often a  
43 result of severe influenza infection and causes acute respiratory distress syndrome (ARDS) and  
44 multiple organ failure in many patients [7].

45 Often, IAV infections are treated with neuraminidase inhibitors, such as oseltamivir (i.e.  
46 TamiFlu), which can be highly effective if administered during the early infection phase. However,  
47 IAV-infected hosts often do not seek treatment until late in their infection when the virus is already  
48 present at high levels and it may be too late for an effective treatment. Especially in the case of H5N1,  
49 neuraminidase inhibitors are often ineffective at containing cytokine storm and do not prevent the  
50 excess morbidity and mortality seen in these infections [8,9]. Moreover, oseltamivir-resistant strains  
51 can quickly evolve, as observed during the 2009 H1N1 pandemic [8].

### 52 *1.1 Immune modulation for the treatment of IAV infection*

53 Modulating the immune response post infection to control inflammation or pre-infection to  
54 provide increased protection for high risk groups has been a major theme in severe influenza  
55 infection research [10–20]. Corticosteroids have been suggested as a potential treatment option for  
56 patients undergoing severe IAV infection with accompanied cytokine storm, while pre-stimulating  
57 interferon-associated pathways have been suggested to protect high-risk groups [7,20–22].  
58 Corticosteroids have anti-inflammatory effects on the host and thus may be used to treat  
59 hypercytokinemia. The impact of corticosteroids on IAV-infected hosts is currently inconclusive.  
60 While some studies indicate steroids are effective in alleviating influenza symptoms in human  
61 patients [23,24], others have shown increased mortality in patients treated with corticosteroids [25–  
62 27].

63 Interferon (IFN) is a key regulator of the innate immune system, and pre-stimulation of  
64 interferon regulating pathways has provided a preventative advantage in mice infected with deadly  
65 influenza viruses [21,22,28]. IFN is essential for viral clearance, has been heavily studied since its  
66 discovery in 1957 [29], and has a complicated role in immunopathology (See [30]for a review). In  
67 recent mouse studies, animals, prior to infection, were exposed to synthetic or natural agonists of the  
68 Toll-Like Receptor pathways (specifically TLR3 and TLR4) that activate IFN production [22,28,31,32].  
69 This pre-stimulation induced higher concentrations of IFN in lung epithelial cells, reduced virus titers  
70 and significantly improved infection outcomes in animals infected with highly pathogenic viruses.  
71 Interestingly, some studies have shown that select bacterial strains in yogurt provide protection  
72 against influenza infection by increasing IFN production [33,34]. The suggested mechanism is that  
73 exopolysaccharides produced by the bacteria exert immunostimulatory effects via the TLR pathways.  
74 These evidences combined with the several studies demonstrating dysregulation of the immune  
75 response during deadly influenza infections [13,17,35,36] suggests that immunomodulation prior to  
76 infection may be an option for protecting high risk groups. Moreover, as IFN is a common component  
77 of mathematical models of influenza-induced immune responses, the ability to replicate the effects  
78 of pre-stimulating IFN-regulating pathways provides a valuable measure of model applicability.

### 79 *1.2 Mathematical models of the lung host response to IAV infection*

80 Mathematical models of the immune response in IAV-infected lungs have previously been used  
81 as a computational platform for treatment optimization [37–43]. Modeling can be an invaluable tool  
82 for ascertaining kinetic parameters of an influenza infection which are difficult to measure in  
83 traditional experiments. Many experimental data sources, particularly murine (mouse) models of  
84 influenza, are generated from a pool of measures collected from hosts subjected to identical  
85 experimental conditions. Multiple hosts are sacrificed at pre-determined intervals and measured for  
86 variables of interest. Because these animals need to be sacrificed to measure cell and cytokine levels,  
87 hosts cannot be tracked for the full duration of the infection, making true longitudinal data  
88 impossible to obtain. These experiments assume that the all animals will react nearly identically to  
89 the infection, but inter-individual variability in hosts can invalidate this assumption. Mathematical  
90 modeling can be used to help fill in gaps in knowledge created by the deficiencies in experimental  
91 data. Models can vary substantially in complexity, depending on the facets of the immune response  
92 they contain and the number of interactions represented.

93 Models generally fall into one of two categories: target cell-limited models, in which the healthy  
94 epithelial cells, which act as a target for the virus, are unable to replicate themselves [38,40], or models

95 in which healthy cells are able to regenerate [37,39,41–43]. These models all feature three basic  
96 components: healthy epithelial cells, infected epithelial cells, and the virus. More components, such  
97 as cytokines, immune cells, or antibodies, can be added to the model with additional equations and  
98 parameters. Larger models can provide a more comprehensive understanding of the immune  
99 response but may also require a larger pool of data from which to calibrate the model. Smaller models  
100 do not need as much data for training the model, but they may also make more simplifying  
101 assumptions that can be difficult to support biologically.

102 In this work, we review three recently published models that contain similar components of the  
103 immune response. We consider two points of comparison. The “systems” perspective being which  
104 components of the model most strongly regulate virus replication. And the “treatment” perspective  
105 being how well do the models recapitulate the observations in IAV-infected animals whose immune  
106 system has been stimulated prior to infection. Pre-stimulation is simulated by increased  
107 concentration of IFN prior to infection. We find that virus concentration is largely influenced by the  
108 proportion of cells in the model that can become infected or virus-resistant; therefore, controlling  
109 these populations is paramount to controlling viral replication. We also find that current models do  
110 not capture the effect of increased IFN concentrations on suppressing virus replication.

## 111 **2. Description of IAV Immune Response Models**

112 To provide a review of current models of IAV-induced immune responses, we selected recent  
113 models which contain common elements of the innate immune response. This allowed for easier  
114 comparisons between model analyses. The models analyzed are: Saenz et al. 2010 [38], Pawelek et al.  
115 2012 [37], and Hancioglu et al. 2007 [39]. Figure 1 depicts the interactions represented within each of  
116 the models. The Saenz and Pawelek models are trained to experimental data (e.g. cytokine  
117 concentrations and immune cell counts) measured in pony lungs infected with H3N8 virus, while the  
118 Hancioglu model was fit to certain qualitative behaviors selected from a study of the human response  
119 to IAV infection by Bocharov and Romanyukha [44].

120 Five elements of the intrahost immune response are conserved across each model: healthy  
121 epithelial cells (H), infected cells (I), virus (V), type I interferon (F), and “resistant cells”, i.e. epithelial  
122 cells with interferon-induced virus resistance (R). While each model has these five features in  
123 common, the inflammatory response to viral infection is represented differently, depending largely  
124 on model complexity. These differences are particularly apparent in the model-specific incorporation  
125 of the production, activity, and depletion of IFN. In the Pawelek model (Figure 1a), interferon has  
126 two functions: creating virus-resistant cells when interacting with healthy epithelial cells, and  
127 increasing infected cell death when interacting with infected epithelial cells. In the Saenz model  
128 (Figure 1b), interferon leads to the creation of virus-resistant cells but does not impact the infected  
129 cells directly. Instead, the infected cells produce more interferon. The Hancioglu model (Figure 1c)  
130 uses interferon to create resistant cells (as in the other two models) while interferon is produced by  
131 infected cells and antigen-presenting cells. In all models, a decrease in interferon levels is caused by  
132 a combination of natural decay and absorption into epithelial cells.

133



134

135 **Figure 1.** Graphical depiction of interactions represented in the three models discussed in this  
 136 manuscript: (a) Pawelek model; (b) Saenz model; (c) Hancioglu model.

### 137 3. Materials and Methods

138 Three ordinary differential equation (ODE) models of the intrahost immune response to IAV  
 139 infection that explicitly included type I interferon were chosen from literature. These three published  
 140 models were selected for their significant variance in complexity; specifically, in the interactions of  
 141 IFN with other model components. For each model, the immune response is simulated in MATLAB  
 142 version R2017a using the parameter values and initial conditions published in the original papers.  
 143 Integration was performed with ode23s.

144 We performed two main assessments on the three featured models: a local sensitivity analysis  
145 and an interferon pre-stimulation study. Sensitivity analysis was performed using a MATLAB  
146 package previously published by Nagaraja et al [45]. The Param\_var\_local.m function performed a  
147 local sensitivity analysis on the virus equation in each model to all parameters over a ten-day  
148 simulation. The function increases and decreases each parameter in the model by 1% and recalculates  
149 the solution to the system of ODEs. Sensitivity is then calculated with the central finite difference  
150 formula to generate logarithmic sensitivities of each equation to each parameter in the model. The  
151 sensitivity of each parameter was ranked by the area under the curve (AUC). Parameters which yield  
152 the highest AUC over the full ten-day simulation are judged to be the most sensitive.

153 Two tests were used to evaluate each model's reaction to simulated interferon pre-stimulation.  
154 First, four values of the initial level of the IFN present in the system ( $F_0$ ) were tested to assess whether  
155 increased initial IFN levels will inhibit viral growth, peak, or clearance. In each case, while the initial  
156 condition on the IFN equation changed, all other initial conditions and parameters remain constant.  
157 Additionally, the amount of time between the initial IFN induction and the start of the infection was  
158 varied by delaying the onset of the virus infection with respect to the IFN. In all cases, induction of  
159 IFN via IFN-regulating pathways is modeled as a step change in IFN concentration. The 6 possible  
160 delays in the virus administration included 0, 2, 4, 6, 8, and 10 days (equivalent to pre-stimulating  
161 IFN 0, 2, 4, 6, 8, and 10 days prior to infection). The initial level of IFN is kept at 1 in these simulations,  
162 though the published initial condition of the fold change of IFN in the Saenz model is 0. To simulate  
163 a true pre-stimulation, there must be a nonzero initial level of IFN to observe the impact of IFN on  
164 the remainder of the system.

## 165 4. Results

### 166 4.1. Sensitivity analysis

#### 167 4.1.1. Pawelek et al. model

168 The Pawelek model includes five equations and nine parameters to model the intrahost immune  
169 response to IAV infection. Epithelial cells begin as healthy target cells (H) and can become infected  
170 (I) through direct interaction with the virus (V) or can become resistant to infection (R) through  
171 interaction with type I interferon (F). Interferon can also lead to enhanced infected cell clearance by  
172 stimulating the activation of natural killer cells, which are not explicitly represented in the model.  
173 The structure of the Pawelek model is given below in equations 3.1.1, and a full list of parameters,  
174 their biological interpretations, nominal values, and units is provided in the Appendix in Table A1.  
175 Note that we used the original version of the equations presented in the paper and not the alternative  
176 version presented by Pawelek *et al.* which incorporates a time-varying death rate  $\delta(t)$  for infected cells  
177 in only the later portion of the simulation. We did not use this artificial delay in infected cell clearance,  
178 as a delay equation would not be consistent with the other two models presented in this review.  
179 Instead,  $\delta = 2/\text{day}$  for the entirety of the simulation.

$$\begin{aligned}H' &= -\beta HV - \phi HF + \rho F, \\I' &= \beta HV - \delta I - \kappa IF, \\R' &= \phi HF - \rho F, \\V' &= pI - cV, \\F' &= qI - dF.\end{aligned}\tag{3.1.1}$$

180 First, a local sensitivity analysis was used to identify model parameters to which the virus titer  
181 is most sensitive. The parameters which most affect the virus level change over time, as shown in  
182 Figure 2a. Over the first two days, the decay rate of interferon ( $d$ ) and the production of resistant cells  
183 ( $\phi$ ) dominate the behavior of the virus. In the later phase of infection, virus behavior is controlled

184 predominantly by the rate at which cells lose their resistance ( $\rho$ ), the death of infected cells ( $\delta$ ), and  
 185 the depletion of interferon ( $d$ ). This implies that in all stages of infection, virus levels are largely  
 186 impacted by interferon and resistant cell populations. Given that interferon controls the number of  
 187 resistant cells in the system, and thus the number of cells available to become infected by the virus,  
 188 the production and depletion of interferon is expected to be vital to the control of the virus growth  
 189 throughout the simulation. Over ten days, the parameters with the highest total AUC are the rate of  
 190 loss of resistance in the epithelial cells ( $\rho$ ) and the decay rate of infected cells ( $\delta$ ). Table 1 shows the  
 191 AUC for each parameter after a ten-day simulation.

192 **Table 1.** AUC of virus equation for each parameter in the Pawelek model.

| Parameter | AUC   |
|-----------|-------|
| $\rho$    | 36.87 |
| $\delta$  | 29.43 |
| $d$       | 24.83 |
| $\phi$    | 14.93 |
| $\beta$   | 8.68  |
| $q$       | 6.59  |
| $c$       | 4.37  |
| $\kappa$  | 4.01  |
| $p$       | 1.90  |

193 Figure 2b depicts the model response to changing these two most sensitive parameters  
 194 concurrently. Colors on the graph correspond to the amount of virus present in the system after ten  
 195 days, where darker colors indicate more virus present. As  $\delta$  increases, the infected cells die at a faster  
 196 rate, and the virus cannot be sustained, leading to a lower virus level at the end of the ten-day  
 197 simulation. As  $\rho$  increases, the healthy epithelial cells regenerate at a faster rate, providing a larger  
 198 pool of cells which may transition to infected cells and produce virus. Thus, as  $\rho$  increases, more virus  
 199 is expected to be present at the end of the simulation. However, the current formulation of the model  
 200 may overfit the parameters, leading to unexpected trends in the end behavior of the virus.  
 201 Specifically, similar values of  $\rho$  and  $\delta$  result in highly different responses (see lower right portion of  
 202 Figure 2b, where  $\log(\delta) = 0$  to  $2$  and  $\log(k_2) = -2.5$  to  $-1$ , demonstrated in the purple box). As more cells  
 203 become resistant, there is greater feedback to the healthy cell population, allowing for a slight  
 204 rebound in the target cell population. With more target cells available to become infected, there is an  
 205 increase in virus over time. The structure of the model thus results in the creation of virus over time  
 206 with the addition of more cells that are resistant to infection. This is an oversimplification of the  
 207 interaction of interferon with epithelial cells and is likely not a true representation of intrahost  
 208 dynamics.



(a) (b)

209 **Figure 2.** (a) Time-dependent sensitivity of virus to each parameter in the Pawelek model; (b) Two-  
 210 dimensional sensitivity of Pawelek model to two most sensitive parameters:  $\rho$  and  $\delta$ . Colors  
 211 correspond to the amount of virus present at ten days post-infection in simulation as a fraction of the  
 212 maximum virus concentration observed. Darker colors correspond to a higher level of virus present  
 213 at day 10, while lighter colors indicate a low level of virus present in the system after ten days.

214 4.1.2. Saenz et al. model

215 The Saenz model includes eight equations and twelve parameters. The epithelial cell population  
 216 is divided into six subtypes, based on whether these cells have been infected with virus (V) and/or  
 217 affected by type I interferon (F). Cells can be healthy cells (H), infected cells that are unprotected by  
 218 interferon (E1), partially resistant healthy cells (W), infected cells that have been affected by interferon  
 219 (E2), productively infected cells (I), or fully resistant cells (R). A list of the parameters, their biological  
 220 interpretations, nominal values, and units is provided in the Appendix in Table A2. The structure of  
 221 the Saenz model is given below in equations 3.1.2:

$$\begin{aligned}
 H' &= -\beta HV - \phi HF, \\
 E_1' &= \beta HV - k_1 E_1, \\
 W' &= \phi FH - m\beta VW - \alpha W, \\
 E_2' &= m\beta VW - k_2 E_2, \\
 R' &= \alpha W, \\
 I' &= k_1 E_1 + k_2 E_2 - \delta I, \\
 V' &= pI - cV, \\
 F' &= nqE_2 - dF + qI.
 \end{aligned}
 \tag{3.1.2}$$

222 We explored the time-dependent sensitivity of the virus to each parameter in the model (Figure  
 223 3a). The first three days post-infection are predominantly controlled by the infectivity of the virus ( $\beta$ ),  
 224 production of virus by infected cells (p), and creation of unprotected infected cells ( $k_1$ ). The later  
 225 phase of the infection is controlled by death of infected cells ( $\delta$ ) and the eclipse phase period of  
 226 interferon-protected infected cells ( $k_2$ ). Table 2 shows the AUC for each parameter after a ten-day  
 227 simulation.  
 228

229 **Table 2.** AUC of virus equation for each parameter in Saenz model.

| Parameter | AUC   |
|-----------|-------|
| $\delta$  | 38.26 |
| $k_2$     | 24.50 |
| c         | 14.43 |
| p         | 13.86 |
| a         | 10.40 |
| $\phi$    | 4.75  |
| q         | 4.75  |
| $\beta$   | 3.35  |

|       |      |
|-------|------|
| $k_1$ | 3.07 |
| $m$   | 2.93 |
| $d$   | 2.00 |
| $n$   | 1.18 |

230 As in the Pawelek model, controlling the death rate of infected cells indirectly controls the death  
 231 rate of the virus, as infected cells are the only source of free virus in the system. The eclipse phase  
 232 also indirectly controls the virus production, since infected cells begin producing free virus as soon  
 233 as the eclipse phase ends and become productively infected cells. The parameters most closely related  
 234 to IFN concentration in the model ( $n$ ,  $q$ ,  $d$ , and  $\phi$ ) are not among the most sensitive for the virus in  
 235 this model.



236 **Figure 3.** (a) Time-dependent sensitivity of virus to each parameter in the Saenz model; (b) Two-  
 237 dimensional sensitivity of Saenz model to two most sensitive parameters:  $k_2$  and  $\delta$ . Colors correspond  
 238 to the amount of virus present at ten days post-infection in simulation as a fraction of the maximum  
 239 virus concentration observed. Darker colors correspond to a higher level of virus present at day 10,  
 240 while lighter colors indicate a low level of virus present in the system after ten days.

241 A two-dimensional scan of the most sensitive parameters to the clearance rate of the virus from  
 242 the host is shown in Figure 3b. As expected, when  $k_2$  and  $\delta$  are high, the infected cells die at an  
 243 increased rate and the virus is completely cleared from the host after ten days. When these parameters  
 244 are low, however, the infected cell population is sustained and the virus remains at high levels ten  
 245 days post-infection.

#### 246 4.1.3. Hancioglu et al. model

247 The Hancioglu model is the largest and most complex of the three models, featuring ten  
 248 equations and 29 parameters. The model includes healthy (H), resistant (R), and infected (I) epithelial  
 249 cells, virus (V), and interferon (F), as in the previous models. In addition, macrophages (M), T cells  
 250 (E), plasma cells (P), antibodies (A), and antigenic distance (S) are incorporated, as shown in Figure  
 251 1c. The total number of epithelial cells is assumed to be constant, so the number of dead epithelial  
 252 cells (D) does not require a differential equation, but rather obeys an algebraic formula:  
 253  $D = 1 - H - I - R$ . Parameters, biological definitions, and their nominal values are defined in Table A3  
 254 in the Appendix. Note that all parameters in this model are scaled such that they are unitless. The  
 255 equations which define the Hancioglu model are given below in (3.1.3):

$$H' = b_{HD}D(H+R) + a_R R - \gamma_{HV}VH - b_{HF}FH,$$

$$I' = \gamma_{HV}VH - a_I I - b_{IE}EI,$$

$$\begin{aligned}
 R' &= b_{HF}FH - a_R R, \\
 V' &= \gamma_V I - \gamma_{VA} SAV - \gamma_{VH} HV - \alpha_V V - \frac{a_{v1} V}{a_{v2} V + 1}, \\
 M' &= (1 - M)(b_{MD} D + b_{MV} V) - a_M M, \\
 F' &= b_F M + c_F I - b_{FH} HF - a_F F, \\
 E' &= b_{EM} ME - b_{EI} IE + a_E (1 - E), \\
 P' &= b_{PM} MP + a_P (1 - P), \\
 A' &= b_A P - \gamma_{AV} SAV - a_A A, \\
 S' &= rP(1 - S).
 \end{aligned}
 \tag{3.1.3}$$

256 Figure 4a shows the sensitivity of the virus equation to each of the parameters of the model.  
 257 Table 3 gives the total AUC for each parameter in the Hancioglu model over the ten-day simulation.

258 **Table 3.** AUC of virus equation for each parameter in Hancioglu model.

| Parameter     | AUC    | Parameter     | AUC   |
|---------------|--------|---------------|-------|
| $\gamma_V$    | 225.56 | $\gamma_{AV}$ | 16.24 |
| $\gamma_{HV}$ | 182.04 | $a_F$         | 11.65 |
| $\gamma_{VA}$ | 137.81 | $a_R$         | 10.69 |
| $b_{EM}$      | 66.00  | $k_E$         | 8.67  |
| $a_I$         | 64.59  | $a_A$         | 8.08  |
| $a_M$         | 46.53  | $b_A$         | 7.54  |
| $c$           | 31.24  | $a_E$         | 6.60  |
| $b_{HF}$      | 24.14  | $b_{FH}$      | 6.24  |
| $b_{MV}$      | 22.02  | $a_{v1}$      | 4.25  |
| $b_F$         | 21.79  | $a_{v2}$      | 4.00  |
| $b_{PM}$      | 21.75  | $\gamma_{VH}$ | 2.90  |
| $b_{MD}$      | 19.95  | $a_P$         | 2.43  |
| $\lambda$     | 19.53  | $c_F$         | 2.35  |
| $b_{EI}$      | 16.91  | $r$           | 0.83  |

259 The early stage infection is largely controlled by virus production by infected cells ( $\gamma_V$ ), infected  
 260 cell death ( $a_I$ ), and loss of resistance in epithelial cells ( $a_R$ ). All three of these parameters are essential  
 261 to controlling the infected cell population, which, like in the previous two models, controls the  
 262 amount of free virus produced by the host. In the later stages of infection,  $\gamma_V$  and the infectivity of  
 263 the virus ( $\gamma_{HV}$ ) are most influential on the virus trajectory.



264 **Figure 4.** (a) Time-dependent sensitivity of virus to each parameter in the Hancioglu model; (b) Two-  
 265 dimensional sensitivity of Hancioglu model to two most sensitive parameters:  $\gamma_{VH}$  and  $\gamma_V$ . Colors  
 266 correspond to the maximum amount of virus present over a ten-day simulation. White indicates that  
 267 the maximum value of  $V$  is 0.01, the initial value of the virus. Darker colors indicate higher values of  
 268 peak virus.

269 The amount of virus present at the end of the simulation does not change based on  $\gamma_V$  or  $\gamma_{VH}$ ; the  
 270 model structure will lead to complete clearance of the virus even if these parameters have changed  
 271 by several orders of magnitude. The mechanism by which the virus will clear does change based on  
 272 the values of  $\gamma_V$  and  $\gamma_{VH}$ , as the peak value of the virus is impacted by these parameters. Figure 4b  
 273 shows the change in the peak value of the virus as these two most sensitive parameters are changed  
 274 concurrently. The nominal model creates a peak virus level of about 100. Varying these parameters  
 275 can lead to a much higher peak viral titer. Changing  $\gamma_V$  or  $\gamma_{VH}$  can create a bifurcation in the virus  
 276 behavior where the virus will either rise to its peak before being cleared by the immune response, or  
 277 the virus will monotonically decay and will not instigate an immune response. When both  $\gamma_V$  and  $\gamma_{VH}$   
 278 are low (bottom left corner of Figure 4b), the infectivity and replication rate of the virus are too small  
 279 to sustain the viral titers, and the virus will harmlessly decay to zero within a few days post-infection.  
 280 As these two parameters increase, the virus replication is strong enough to sustain an infection and  
 281 the immune response will be activated. Higher  $\gamma_V$  values cause the virus to peak faster, which then  
 282 can lead to faster clearance, as the immune components in this model are virus-dependent (see Figure  
 283 1c).

#### 284 4.2. Models' response to simulated IFN pre-stimulation

285 We simulated IFN pre-stimulation in these models by changing the initial concentration of IFN  
 286 in the system. Currently, several compounds which stimulate TLR pathways to induce IFN  
 287 production and increase protection during severe respiratory infection are being studied [46]. The  
 288 effect of these compounds on the dynamic response of the lung immune systems has not been  
 289 determined. Several experiments have indicated a protective effect of pre-stimulation of TLR  
 290 pathways before influenza infection in murine models [46–49]. We tested the three ODE models to  
 291 determine whether they could replicate these experimental results. For each model, the response to  
 292 changing both the magnitude of the initial interferon levels and the time between the initial interferon  
 293 induction and the viral infection is reported.

##### 294 4.2.1 Pawelek model response to IFN pre-stimulation

295 Figure 5a depicts the impact of altering the initial levels of IFN ( $F_0$ ) present in the system when  
 296 the virus is administered. The Pawelek model predicts three phases of behavior based on the amount  
 297 of interferon concentration initially in the host. At high levels of interferon, there is a quick rise in the  
 298 virus followed by a slow decay, leading to eventual clearance from the host. When  $F_0$  is 1, the virus

299 exhibits biphasic behavior, with an initial peak approximately 12 hours post-infection and a second  
 300 peak around 2 days post-infection, followed by slow clearance of the virus over the next week. When  
 301  $F_0$  is very low (less than 1), the same initial peak after 12 hours is followed by a long, slow rise in the  
 302 virus trajectory after day 3. At high levels of  $F_0$ , the virus peak is about 2 orders of magnitude lower  
 303 than the other simulations, and the healthy cells show a slight rebound before dying out around 1  
 304 day post-infection. The IFN also monotonically decays when it is initially set to a high level and does  
 305 not show the same rebound behavior seen in lower initial levels of IFN. Despite these three  
 306 differences, it is difficult to determine how these rebounding virus trajectories would impact the  
 307 survival of the host. The Pawelek model leads to complete death of all healthy cells in all trajectories,  
 308 meaning there are no target cells remaining for the virus to infect after a few days of the infection.  
 309 Because of this, the Pawelek model cannot accurately predict whether high initial concentrations of  
 310 IFN would save the host.



311 Figure 5. (a) Response of Pawelek model to increasing IFN on day 0. Lines correspond to different  
 312 values of  $F_0$  (initial condition of interferon); (b) Impact of IFN pre-stimulation scheduling on the  
 313 Pawelek model. IFN treatment is given on day 0 and patients are simulated to become infected 2, 4,  
 314 6, 8, or 10 days after treatment.

315 The impact of changing the time between the IFN pre-stimulation and the onset of the infection  
 316 is shown in Figure 5b. Each line denotes a different simulation in which the virus is administered at  
 317 the indicated day on the figure legend. Again, changing the time between treatment and infection  
 318 causes three phases of behavior in the virus. When IFN induction and virus are given simultaneously  
 319 (red “No pre-stimulation” line), the simulation describes the behavior of an untreated patient. In this  
 320 case, the virus peaks almost immediately, falls, and then exhibits a smaller, secondary peak around  
 321 day 2 as the infected cells have time to produce more virus.

322 The other simulations in Figure 5b show that the Pawelek model predicts a negative impact on  
 323 the host after IFN pre-stimulation. With a 2-day pre-stimulation (blue line), the virus trajectory is  
 324 approximately the same as the nominal model. The initial peak reaches the same magnitude as the  
 325 nominal model, but the secondary peak is more pronounced. When IFN is given before the virus,  
 326 there are no infected cells present in the system (which are the only sources of IFN in this model).  
 327 Thus, the IFN levels will decrease until the virus is introduced on day 2. At that point, the IFN has  
 328 decreased approximately two orders of magnitude, meaning the initial treatment was not sustained  
 329 and has had a deleterious effect on the host, as there is less IFN present in the system than under  
 330 normal circumstances.

331 As the delay between IFN pre-stimulation and virus lengthens, this effect becomes more  
 332 pronounced. While the initial virus peak always reaches the same magnitude, the secondary peak,  
 333 which controls the long-term behavior of the system, gets larger with the increased delay. This  
 334 indicates that the model predicts a long-lasting influenza infection after significant IFN pre-  
 335 stimulation rather than any improvement in patient outcomes, regardless of the length of time  
 336 between virus and IFN treatment.

### 337 4.2.2 Saenz model response to IFN pre-stimulation

338 The response of the Saenz model to an increase in the initial IFN present in the system is shown  
 339 in Figure 6a. Changing the level of IFN creates a bifurcation in the virus peak magnitude. When  $F_0$  is  
 340 below 1, the virus peak reaches  $10^5$  PFU (a 5-fold change in the virus level). IFN and infected cells rise  
 341 to their peaks around 3 days post-infection, and healthy cells die out within 2 days. When  $F_0$  is above  
 342 1, however, the virus peak only reaches approximately 10 PFU. IFN decays monotonically, and  
 343 almost no infected cells are created. Healthy cells die out almost instantly upon infection, as more  
 344 resistant cells can be created from the increased initial IFN levels.



345 Figure 6. (a) Response of Saenz model to increasing IFN on day 0. Lines correspond to different values  
 346 of  $F_0$  (initial condition of interferon); (b) Impact of IFN pre-stimulation scheduling on the Saenz  
 347 model. IFN treatment is given on day 0 and patients are simulated to become infected 2, 4, 6, 8, or  
 348 10 days after treatment.

349 Figure 6b illustrates the impact of IFN pre-stimulation on the system. The nominal model (red  
 350 “No pre-stimulation” line) is equivalent to the turquoise line ( $F_0=1$ ) in Figure 6a. As the time between  
 351 the initial IFN pre-stimulation and virus infection increases, we see the pre-stimulation confers  
 352 protection on the host by creating a larger pool of resistant cells initially, leading to a depletion of  
 353 healthy cells within hours of the initiation of the simulation. When the host becomes infected, there  
 354 is not a large enough pool of healthy cells available to create any substantial infected cell population.  
 355 Without these cells, no new virus can be produced, so the virus monotonically decays to zero within  
 356 only a few days post-infection.

357 Like the Pawelek model, the Saenz model cannot support high levels of IFN without the  
 358 presence of virus, as only infected cells can produce more IFN. In all simulations, the IFN decays  
 359 steadily and more rapidly than in the Pawelek simulations in Figure 5. This is largely due to the  
 360 differences in the decay rate of IFN between the two models (Pawelek model,  $d = 1.9 \text{ day}^{-1}$ , Saenz  
 361 model,  $d = 6.8 \text{ day}^{-1}$ ).

### 362 4.2.3 Hancioglu model response to IFN pre-stimulation

363 The Hancioglu model (Figure 7) shows very little sensitivity to the time of IFN induction or the  
 364 magnitude of interferon concentration. There is a negligible difference in the time to the peak of the  
 365 virus when  $F_0 = 1$  versus  $F_0 = 100$ . The model’s parameters were fit in a way such that the behavior  
 366 of the model does not change, even with an enormous initial influx of interferon. An initial absence  
 367 of interferon has no impact on the virus trajectory. Despite the presence of resistant cells in the model,  
 368 interferon has no major effect on the system.

369 When the system is tested with a pre-stimulation of interferon (Figure 7b), there is little change  
 370 in the behavior of the virus. The entire system shifts horizontally with the time delay, but the overall  
 371 behavior of the model does not change. Like in previous models, without a starting virus population,

372 the system cannot sustain the initial concentration of IFN. When the virus is finally introduced, the  
 373 IFN level has essentially fallen to zero, making any impact from the pre-stimulation negligible.



374 Figure 7. (a) Response of Hancioglu model to increasing IFN on day 0. Lines correspond to different  
 375 values of F0 (initial condition of interferon); (b) Impact of IFN pre-stimulation scheduling on the  
 376 Hancioglu model. IFN treatment is given on day 0 and patients are simulated to become infected 2,  
 377 4, 6, 8, or 10 days after treatment.

## 378 5. Discussion

379 Interferon is known to have several antiviral effects in an IAV-infected host, including activating  
 380 an antiviral state in epithelial cells, sensitizing cells to apoptosis, activating NK cells, and initiating  
 381 the differentiation of cytotoxic T cells [50–53]. Each analyzed model represents a distinct subset of  
 382 these interactions, including the creation and depletion of virus-resistant cells. In the Pawelek model,  
 383 IFN is only produced by infected cells, and healthy cells can become resistant through an interaction  
 384 with IFN. This resistance fades over time and cells return to a susceptible state. Resistant cells in the  
 385 Hancioglu model also become susceptible, but IFN can be produced by either infected cells or antigen  
 386 presenting cells. Conversely, the Saenz model features epithelial cells that are either partially or fully  
 387 resistant to infection, and cells do not lose resistance over time.

388 Each of the three models shows a sensitivity of the virus to the creation and loss of infected  
 389 epithelial cells. The virus equation of the Pawelek model is most sensitive to the loss of resistance in  
 390 epithelial cells and the death rate of infected cells. If the infected cells die off too quickly, the virus  
 391 cannot replicate at a rate high enough to sustain the infection. Similarly, if cells are becoming virus-  
 392 resistant too quickly, there will not be a sufficient number of cells remaining to become infected and  
 393 keep the viral titers elevated. In this way, the presence of the virus in the system is predominantly  
 394 driven by the number of cells currently infected or able to become infected. The Saenz model also  
 395 emphasizes a low death rate of infected cells, as well as a short eclipse phase for infected cells. The  
 396 duration of the eclipse phase determines the delay in time between the infection of the cell and the  
 397 subsequent release of virion by the infected cell. The shorter the eclipse phase, the more readily the  
 398 cells can begin producing virus. As in the Pawelek model, the Saenz model shows that the availability  
 399 of productively infected cells is vital to the continuation of the infection.

400 The Hancioglu model also emphasizes the importance of maintaining a large pool of infected  
 401 cells, but through a different set of parameters than the Pawelek or Saenz models. The infectivity of  
 402 the virus and the replication rate of the virus are the most sensitive parameters in the model. The  
 403 Hancioglu model is thus controlling the virus by a high rate of production of infected cells, and not  
 404 through a diminished rate of decay of these cells, as in the other two models. Interestingly, none of  
 405 the three models shows a strong sensitivity of virus to the concentration of IFN in the system.

406 All models must make some simplifying assumptions, and thus, no models are fully accurate in  
 407 their representation of the host response to pre-stimulating IFN-regulating pathways. While these  
 408 models had been analyzed in previous reviews [54], previous work had only shown how these

409 models respond to knockouts of various immune components. Here, we perform a complementary  
410 study to test early stimulation as well as increased initial levels of IFN to determine if altering IFN  
411 levels can improve patient outcomes. Of the three models studied, only one showed significant  
412 impact after early IFN induction. The Saenz model predicts a lower viral peak with increased initial  
413 interferon levels and a monotonic decay of the virus over time if interferon is stimulated early. Early  
414 available interferon creates a large pool of resistant cells in a short period of time and, because the  
415 Saenz model does not allow for loss of resistance in cells over time, resistant cells remain resistant for  
416 the rest of the simulation. Thus, the system cannot replenish the source of target cells for the virus to  
417 infect and the virus concentration decreases steadily. However, this is not a realistic way to represent  
418 immune dynamics, as epithelial cells certainly lose their viral resistance over time.

419 The other two models do not demonstrate this effect of IFN on viral clearance. The Pawelek  
420 model is structured such that early administration of interferon-inducing compounds worsens the  
421 impact of the virus by creating a secondary rebound of virus in later stages of infection, essentially  
422 leading to chronic infection (which is unlikely to be realistic). The Hancioglu model shows no  
423 sensitivity to the initial interferon concentration or to the relative timing of infection. Changing the  
424 time of the virus infection simply shifts the curves in time but does not change their shape. This model  
425 implies that interferon has minimal impact on the host, which does not agree with decades of  
426 experimental evidence [29,55,56].

427 By stimulating an early IFN response in the model, we simulate a host receiving a preventative  
428 treatment for IAV infection (e.g. a TLR agonist [22,28]). Dobrovolny *et al.* [54] previously investigated  
429 how these models react to IFN suppression post-infection, which may suffice to simulate a steroid  
430 treatment for influenza as steroids are known to downregulate IFN signaling [20,57]. The Hancioglu  
431 and Pawelek models predict that IFN has a significant impact on viral clearance when completely  
432 removed from the system because no resistant cells are created and the population of susceptible cells  
433 remains high for a longer period of time [54]. In the Saenz model, however, removing IFN does not  
434 yield this effect, as cells in this model cannot lose resistance. Therefore, these models may not  
435 accurately represent the effect of IFN pre-stimulation for influenza, as they make many simplifying  
436 assumptions about the role of IFN in the host immune response to IAV infection.

437 Currently, we do not have sufficient experimental or computational evidence to support a  
438 recommendation for IFN pre-stimulation or corticosteroid treatment post-infection. Few references  
439 exist showing steroid treatment of IAV-infected humans [9,58–60], and those few have not shown  
440 significant impacts on mortality rate [61]. For many years, physicians turned toward high doses of  
441 steroids, though recent research suggests that lower doses are more effective [61,62]. It is quite  
442 possible that steroid treatment could be effective in humans, but the timing and magnitude of the  
443 drug has not yet been optimized. Tan *et al.* [47] have shown Pam2Cys, a TLR-2 agonist, can instigate  
444 an inflammatory response even in the absence of an antigen. Mice pre-treated with Pam2Cys were  
445 protected from H1N1 virus for up to 7 days post-treatment. Pre-stimulation of TLR-3 by  
446 polyinosinic:polycytidylic acid (poly IC) has also shown promise in protecting mice against H5N1  
447 and H3N2 [48]. TLR-3 pre-stimulation has been effective in protecting rhesus monkeys from yellow  
448 fever [63]. While IFN-prestimulating compounds have been very promising in animal models, they  
449 are still in the early phases of drug development [46]. Nonetheless, the effects of IFN pre-stimulation  
450 has been well established and the dynamics induced by pre-stimulation are highly valuable for  
451 mathematical model discrimination.

452 While the models presented do capture many aspects of the immune response to IAV infection,  
453 more experimental data is needed to improve the characterization of IFN-regulated immune  
454 dynamics. Shinya *et al.* [64] demonstrated the IFN pre-stimulation from 12h to 3 days pre-infection  
455 improved survival to IAV-infected mice, but a more thorough dosing range and high temporal  
456 resolution of the data are needed to improve model development and validation.

457 This review has shown that simply creating a population of virus-resistant cells is not sufficient  
458 to model the impact of IFN on control of virus replication. This is the mechanism by which many  
459 current published models, including the three covered in this paper, incorporate the effect of IFN on  
460 the immune response. For a truly accurate mathematical model, the model structure should be able

461 to simulate known qualitative behaviors as well as reproduce the quantitative data used to tune the  
 462 model parameters. The models used in this review do not include a mechanism by which IFN levels  
 463 can be sustained if the virus is not present in the system (see Figures 5b, 6b, and 7b). The pre-  
 464 stimulation is thus ineffective because IFN decays monotonically until the virus is administered days  
 465 later. Additional cellular sources of IFN production, such as monocytes, may be necessary for a  
 466 biologically accurate ODE model. The Hancioglu model does include a term for macrophage-derived  
 467 IFN production, but macrophages are only induced to produce IFN if the virus has been introduced  
 468 to the system, so this model cannot sustain increased IFN concentration in the absence of pathogen.  
 469 The Pawelek and Saenz models only contain infected epithelial cell production of IFN.

470 Future ODE models of influenza infection should include a better representation of innate  
 471 immunity, and possibly more interactions of IFN with other components in the model, to accurately  
 472 portray the impact of IFN on the system as a whole. Rather than reliance on the creation of virus-  
 473 resistant cells to simulate the effect of IFN on the host, IFN could be used to directly diminish the  
 474 replication rate of the virus, similar to a model proposed by Baccam et al. [40]. Alternatively, IFN  
 475 could be used to lower the infectivity of the virus and slow the creation of infected epithelial cells.  
 476 These models could then be used to test the protection conferred by IFN pre-stimulation seen in many  
 477 murine models of influenza A virus infection [21,22,28,33,65,66].

478 **Acknowledgments:** The authors acknowledge funding support from the University of Pittsburgh’s Swanson  
 479 School of Engineering and the University of Pittsburgh’s Central Research Development Fund (CRDF).

480 **Author Contributions:** E.M. and J.E.S. conceived and designed the experiments; E.M. performed the  
 481 experiments; E.M., E.A., and J.E.S. analyzed the data; E.M., E.A., and J.E.S. wrote the paper.

482 **Conflicts of Interest:** The authors declare no conflict of interest. The founding sponsors had no role in the design  
 483 of the study; in the collection, analyses, or interpretation of data; in the writing of the manuscript, and in the  
 484 decision to publish the results.

485 **Appendix A**

486 **Table A1.** Parameter definitions and values for the Pawelek model.

| Parameter | Definition                                              | Value                 | Units                                                            |
|-----------|---------------------------------------------------------|-----------------------|------------------------------------------------------------------|
| $\beta$   | Infectivity of virus                                    | $4.7 \times 10^{-5}$  | (RNA copy) <sup>-1</sup><br>ml NS day <sup>-1</sup>              |
| $\phi$    | Rate of production of virus-resistant epithelial cells  | 0.33                  | (IFN fold<br>change) <sup>-1</sup> day <sup>-1</sup>             |
| $\rho$    | Rate of loss of resistance in epithelial cells          | 2.6                   | day <sup>-1</sup>                                                |
| $\delta$  | Death of infected epithelial cells                      | 2                     | day <sup>-1</sup>                                                |
| $\kappa$  | Rate of infected cell clearance by natural killer cells | 4.2                   | (IFN fold<br>change) <sup>-1</sup> day <sup>-1</sup>             |
| $p$       | Replication rate of virus                               | $5.3 \times 10^{-3}$  | (RNA copy) <sup>-1</sup><br>day <sup>-1</sup> cell <sup>-1</sup> |
| $c$       | Clearance of virus by immune system                     | 16                    | day <sup>-1</sup>                                                |
| $q$       | Rate of production of interferon by infected cells      | $9.6 \times 10^{-10}$ | (IFN fold<br>change) day <sup>-1</sup><br>cell <sup>-1</sup>     |
| $d$       | Rate of depletion of interferon                         | 1.99                  | day <sup>-1</sup>                                                |

487 **Table A2.** Parameter definitions and values for the Saenz model.

| Parameter | Definition                                             | Value                | Units                                                |
|-----------|--------------------------------------------------------|----------------------|------------------------------------------------------|
| $\beta$   | Infectivity of virus                                   | $1.4 \times 10^{-4}$ | (RNA copy) <sup>-1</sup><br>ml NS day <sup>-1</sup>  |
| $\phi$    | Rate of production of virus-resistant epithelial cells | 56                   | (IFN fold<br>change) <sup>-1</sup> day <sup>-1</sup> |

|          |                                                                |                      |                                                                  |
|----------|----------------------------------------------------------------|----------------------|------------------------------------------------------------------|
| $k_1$    | Rate of production of unprotected infected cells               | 2                    | day <sup>-1</sup>                                                |
| $\delta$ | Death of infected epithelial cells                             | 2                    | day <sup>-1</sup>                                                |
| $m$      | IFN-reduced infectivity                                        | 1                    | unitless                                                         |
| $k_2$    | Eclipse phase of interferon-protected infected cells           | 2                    | day <sup>-1</sup>                                                |
| $\alpha$ | Rate at which partially-resistant cells become fully resistant | 4                    | day <sup>-1</sup>                                                |
| $p$      | Replication rate of virus                                      | $1.4 \times 10^{-5}$ | (RNA copy) <sup>-1</sup><br>day <sup>-1</sup> cell <sup>-1</sup> |
| $c$      | Clearance of virus by immune system                            | 5.2                  | day <sup>-1</sup>                                                |
| $q$      | Rate of production of interferon by infected epithelial cells  | $5 \times 10^{-10}$  | (IFN fold<br>change) day <sup>-1</sup><br>cell <sup>-1</sup>     |
| $d$      | Rate of depletion of interferon                                | 6.8                  | day <sup>-1</sup>                                                |
| $n$      | IFN-reduced production                                         | 1                    | unitless                                                         |

488

**Table A3.** Parameter definitions and values for the Hancioglu model.

| Parameter     | Definition                                                      | Value              |
|---------------|-----------------------------------------------------------------|--------------------|
| $\gamma_{HV}$ | Rate of epithelial cells infected by virus                      | 0.34               |
| $a_R$         | Loss of resistance to infection                                 | 1                  |
| $a_I$         | Death of infected cells                                         | 1.5                |
| $b_{HD}$      | Rate of regeneration of epithelial cells                        | 4                  |
| $\alpha_V$    | Nonspecific clearance of virus                                  | 1.7                |
| $b_{IE}$      | Clearance of infected cells by effector cells                   | 0.066              |
| $b_{FH}$      | Rate of binding of IFN to epithelial cells                      | 17                 |
| $\gamma_V$    | Rate of virus secretion by infected cells                       | 510                |
| $\gamma_{VA}$ | Rate of antibody neutralization of virus                        | 619.2              |
| $\gamma_{VH}$ | Rate of adsorption of virus by infected cells                   | 1.02               |
| $a_{V1}$      | Nonspecific clearance of virus                                  | 100                |
| $a_{V2}$      | Nonspecific clearance of virus                                  | 23000              |
| $b_{MD}$      | Stimulation of antigen presenting cells by dead cells           | 1                  |
| $b_{MV}$      | Stimulation of antigen presenting cells by virus                | 0.0037             |
| $a_M$         | Death of antigen presenting cells                               | 1                  |
| $b_F$         | IFN production by antigen presenting cells                      | 250000             |
| $c_F$         | IFN production by infected cells                                | 2000               |
| $b_{HF}$      | Rate of production of virus-resistant cells                     | 0.01               |
| $a_F$         | Natural decay of IFN                                            | 8                  |
| $b_{EM}$      | Production of effector cells                                    | 8.3                |
| $b_{EI}$      | Death of effector cells through interaction with infected cells | 2.72               |
| $a_E$         | Natural death of effector cells                                 | 0.4                |
| $b_{PM}$      | Production of plasma cells                                      | 11.5               |
| $a_P$         | Death of plasma cells                                           | 0.4                |
| $b_A$         | Production of antibodies by plasma cells                        | 0.043              |
| $\gamma_{AV}$ | Rate at which antibodies bind to virus                          | 146.2              |
| $a_A$         | Natural decay of antibodies                                     | 0.043              |
| $r$           | Rate of compatibility of antibodies and virus                   | $3 \times 10^{-5}$ |

489

## 490 References

- 491 1. World Health Organization Influenza (Seasonal).
- 492 2. Potter, C. W. A history of influenza. *J. Appl. Microbiol.* **2001**, *91*, 572–579, doi:10.1046/j.1365-  
493 2672.2001.01492.x.
- 494 3. Kilbourne, E. D. Influenza pandemics of the 20th century. *Emerg. Infect. Dis.* **2006**, *12*, 9–14,  
495 doi:10.3201/eid1201.051254.
- 496 4. James R. Gill, MD, Zong-Mei Sheng, MD, PhD, Susan F. Ely, MD, MPHTM, Donald G. Guinee Jr, MD,  
497 Mary B. Beasley, MD, James Suh, MD, Charuhas Deshpande, MD, Daniel J. Mollura, MD, David M.  
498 Morens, MD, Mike Bray, MD, William D. Travis, MD, and Jeff, P. Pulmonary Pathologic Findings of  
499 Fatal 2009 Pandemic Influenza A/H1N1 Viral Infections. *Arch. Pathol. Lab. Med.* **2010**, *134*.
- 500 5. Chotpitayasunondh, T.; Ungchusak, K.; Hanshaoworakul, W.; Chunsuthiwat, S.; Sawanpanyalert, P.;  
501 Kijphati, R.; Lochindarat, S.; Srisan, P.; Suwan, P.; Osotthanakorn, Y.; Anantasetagoon, T.; Kanjanawasri,  
502 S.; Tanupattarachai, S.; Weerakul, J.; Chaiwirattana, R.; Maneerattanaporn, M.; Poolsavatkikool, R.;  
503 Chokephaibulkit, K.; Apisarnthanarak, A.; Dowell, S. F. Human disease from influenza A (H5N1),  
504 Thailand, 2004. *Emerg. Infect. Dis.* **2005**, *11*, 201–209, doi:10.3201/eid1102.041061.
- 505 6. Truong, N. T.; Long, H. T.; Ph, D.; Tung, C. V.; Giang, L. T.; Ph, D. Avian influenza A (H5N1) in 10  
506 patients in Vietnam. *N. Engl. J. Med.* **2004**, *350*, 1179–1188.
- 507 7. Liu, Q.; Zhou, Y. H.; Yang, Z. Q. The cytokine storm of severe influenza and development of  
508 immunomodulatory therapy. *Cell. Mol. Immunol.* **2016**, *13*, 3–10, doi:10.1038/cmi.2015.74.
- 509 8. Hayden, F. G. Antiviral Resistance in Influenza Viruses — Implications for Management and Pandemic  
510 Response. *N. Engl. J. Med.* **2006**, *354*, 785–788.
- 511 9. Beigel, J. H.; Farrar, J.; Han, A. M.; Hayden, F. G.; Hyer, R.; de Jong, M. D.; Lochindarat, S.; Tien, N. T.  
512 K.; Hein, N. T. Avian influenza A (H5N1) infection in humans. *N Engl J Med* **2005**, *353*, 1374–1385.
- 513 10. Lee, K.-Y.; Rhim, J.-W.; Kang, J.-H. Hyperactive immune cells (T cells) may be responsible for acute lung  
514 injury in influenza virus infections: a need for early immune-modulators for severe cases. *Med.*  
515 *Hypotheses* **2011**, *76*, 64–9, doi:10.1016/j.mehy.2010.08.032.
- 516 11. Peiris, J. S. M.; Cheung, C. Y.; Leung, C. Y. H.; Nicholls, J. M. Innate immune responses to influenza A  
517 H5N1: friend or foe? *Trends Immunol.* **2009**, *30*, 574–84, doi:10.1016/j.it.2009.09.004.
- 518 12. Zheng, B.-J.; Chan, K.-W.; Lin, Y.-P.; Zhao, G.-Y.; Chan, C.; Zhang, H.-J.; Chen, H.-L.; Wong, S. S. Y.; Lau,  
519 S. K. P.; Woo, P. C. Y.; Chan, K.-H.; Jin, D.-Y.; Yuen, K.-Y. Delayed antiviral plus immunomodulator  
520 treatment still reduces mortality in mice infected by high inoculum of influenza A/H5N1 virus. *Proc.*  
521 *Natl. Acad. Sci. U. S. A.* **2008**, *105*, 8091–6, doi:10.1073/pnas.0711942105.
- 522 13. Cilloniz, C.; Pantin-Jackwood, M. J.; Ni, C.; Goodman, A. G.; Peng, X.; Proll, S. C.; Carter, V. S.;  
523 Rosenzweig, E. R.; Szretter, K. J.; Katz, J. M.; Korth, M. J.; Swayne, D. E.; Tumpey, T. M.; Katze, M. G.  
524 Lethal dissemination of H5N1 influenza virus is associated with dysregulation of inflammation and  
525 lipoxin signaling in a mouse model of infection. *J. Virol.* **2010**, *84*, 7613–24, doi:10.1128/JVI.00553-10.
- 526 14. Menachery, V. D.; Einfeld, A. J.; Schäfer, A.; Josset, L.; Sims, A. C.; Proll, S.; Fan, S.; Li, C.; Neumann, G.;  
527 Tilton, S. C.; Chang, J.; Gralinski, L. E.; Long, C.; Green, R.; Williams, C. M.; Weiss, J.; Matzke, M. M.;  
528 Webb-robertson, B.; Schepmoes, A. A.; Shukla, A. K.; Metz, T. O.; Smith, R. D.; Waters, K. M.; Katze, M.  
529 G.; Kawaoka, Y.; Baric, S. Pathogenic Influenza Viruses and Coronaviruses Utilize Similar and  
530 Contrasting Approaches To Control Interferon-Stimulated Gene Responses. *MBio* **2014**, *5*, 1–11,  
531 doi:10.1128/mBio.01174-14.Editor.
- 532 15. Walsh, K. B.; Teijaro, J. R.; Rosen, H.; Oldstone, M. B. A. Quelling the storm: utilization of sphingosine-

- 533 1-phosphate receptor signaling to ameliorate influenza virus-induced cytokine storm. *Immunol. Res.*  
534 **2011**, *51*, 15–25, doi:10.1007/s12026-011-8240-z.
- 535 16. Snelgrove, R. J.; Godlee, A.; Hussell, T. Airway immune homeostasis and implications for influenza-  
536 induced inflammation. *Trends Immunol.* **2011**, *32*, 328–34, doi:10.1016/j.it.2011.04.006.
- 537 17. de Jong, M. D.; Simmons, C. P.; Thanh, T. T.; Hien, V. M.; Smith, G. J. D.; Chau, T. N. B.; Hoang, D. M.;  
538 Chau, N. V. V.; Khanh, T. H.; Dong, V. C.; Qui, P. T.; Cam, B. Van; Ha, D. Q.; Guan, Y.; Peiris, J. S. M.;  
539 Chinh, N. T.; Hien, T. T.; Farrar, J. Fatal outcome of human influenza A (H5N1) is associated with high  
540 viral load and hypercytokinemia. *Nat. Med.* **2006**, *12*, 1203–7, doi:10.1038/nm1477.
- 541 18. Tisoncik, J. R.; Korth, M. J.; Simmons, C. P.; Farrar, J.; Martin, T. R.; Katze, M. G. Into the eye of the  
542 cytokine storm. *Microbiol. Mol. Biol. Rev.* **2012**, *76*, 16–32, doi:10.1128/MMBR.05015-11.
- 543 19. Falagas, M. E.; Vouloumanou, E. K.; Baskouta, E.; Rafailidis, P. I.; Polyzos, K.; Rello, J. Treatment options  
544 for 2009 H1N1 influenza: evaluation of the published evidence. *Int. J. Antimicrob. Agents* **2010**, *35*, 421–  
545 30, doi:10.1016/j.ijantimicag.2010.01.006.
- 546 20. Carter, M. J. A rationale for using steroids in the treatment of severe cases of H5N1 avian influenza. *J.*  
547 *Med. Microbiol.* **2007**, *56*, 875–883, doi:10.1099/jmm.0.47124-0.
- 548 21. Shinya, K.; Ito, M.; Makino, A.; Tanaka, M.; Miyake, K.; Einfeld, A. J.; Kawaoka, Y. The TLR4-TRIF  
549 Pathway Protects against H5N1 Influenza Virus Infection. *J. Virol.* **2012**, *86*, 19–24, doi:10.1128/JVI.06168-  
550 11.
- 551 22. Shinya, K.; Okamura, T.; Sueta, S.; Kasai, N.; Tanaka, M.; Ginting, T. E.; Makino, A.; Einfeld, A. J.;  
552 Kawaoka, Y. Toll-like receptor pre-stimulation protects mice against lethal infection with highly  
553 pathogenic influenza viruses. *Virol. J.* **2011**, *8*, 97, doi:10.1186/1743-422X-8-97.
- 554 23. Kudo, K.; Takasaki, J.; Manabe, T.; Uryu, H.; Yamada, R.; Kuroda, E.; Kobayashi, N.; Matsushita, T.  
555 Systemic corticosteroids and early administration of antiviral agents for pneumonia with acute  
556 wheezing due to influenza A(H1N1)pdm09 in Japan. *PLoS One* **2012**, *7*,  
557 doi:10.1371/journal.pone.0032280.
- 558 24. Kil, H.-R.; Lee, J.-H.; Lee, K.-Y.; Rhim, J.-W.; Youn, Y.-S.; Kang, J.-H. Early corticosteroid treatment for  
559 severe pneumonia caused by 2009 H1N1 influenza virus. *Crit. Care* **2011**, *15*, 413, doi:10.1186/cc10082.
- 560 25. Brun-Buisson, C.; Richard, J.-C. M.; Mercat, A.; Thiébaud, A. C. M.; Brochard, L. Early Corticosteroids in  
561 Severe Influenza A/H1N1 Pneumonia and Acute Respiratory Distress Syndrome. *Am. J. Respir. Crit. Care*  
562 *Med.* **2011**, *183*, 1200–1206, doi:10.1164/rccm.201101-0135OC.
- 563 26. Kim, S.-H.; Hong, S.-B.; Yun, S.-C.; Choi, W.-I.; Ahn, J.-J.; Lee, Y. J.; Lee, H.-B.; Lim, C.-M.; Koh, Y.  
564 Corticosteroid Treatment in Critically Ill Patients with Pandemic Influenza A / H1N1 2009 Infection  
565 Analytic Strategy Using Propensity Scores. *Am J Respir Crit Care Med* **2011**, *183*, 1207–1214,  
566 doi:10.1164/rccm.201101-0110OC.
- 567 27. Salomon, R.; Hoffmann, E.; Webster, R. G. Inhibition of the cytokine response does not protect against  
568 lethal H5N1 influenza infection. *Proc. Natl. Acad. Sci. U. S. A.* **2007**, *104*, 12479–12481,  
569 doi:10.1073/pnas.0705289104.
- 570 28. Cluff, C. W.; Baldrige, J. R.; Stöver, A. G.; Evans, T.; Johnson, D. A.; Lacy, M. J.; Valerie, G.; Yorgensen,  
571 V. M.; Johnson, C. L.; Mark, T.; Hershberg, R. M.; Persing, D. H.; Sto, A. G.; Evans, J. T.; Clawson, V. G.;  
572 Livesay, M. T. Synthetic Toll-Like Receptor 4 Agonists Stimulate Innate Resistance to Infectious  
573 Challenge Synthetic Toll-Like Receptor 4 Agonists Stimulate Innate Resistance to Infectious Challenge.  
574 *Infect. Immun.* **2005**, *73*, 3044–3052, doi:10.1128/IAI.73.5.3044.
- 575 29. Isaacs, A.; Lindenmann, J. Virus interference. I. The interferon. *Proc. R. Soc. London* **1957**, *147*, 258–67.

- 576 30. Trinchieri, G. Type I interferon: friend or foe? *J. Exp. Med.* **2010**, *207*, 2053–63, doi:10.1084/jem.20101664.
- 577 31. Tanaka, A.; Nakamura, S.; Seki, M.; Fukudome, K.; Iwanaga, N.; Imamura, Y.; Miyazaki, T.; Izumikawa,
- 578 K.; Kakeya, H.; Yanagihara, K.; Kohno, S. Toll-like receptor 4 agonistic antibody promotes innate
- 579 immunity against severe pneumonia induced by coinfection with influenza virus and Streptococcus
- 580 pneumoniae. *Clin. Vaccine Immunol.* **2013**, *20*, 977–985, doi:10.1128/CVI.00010-13.
- 581 32. Wong, J. P.; Christopher, M. E.; Viswanathan, S.; Dai, X.; Salazar, A. M.; Sun, L. Q.; Wang, M. Antiviral
- 582 role of toll-like receptor-3 agonists against seasonal and avian influenza viruses. *Curr. Pharm. Des.* **2009**,
- 583 *15*, 1269–1274, doi:10.2174/138161209787846775.
- 584 33. Nagai, T.; Makino, S.; Ikegami, S.; Itoh, H.; Yamada, H. Effects of oral administration of yogurt fermented
- 585 with *Lactobacillus delbrueckii* ssp. *bulgaricus* OLL1073R-1 and its exopolysaccharides against influenza
- 586 virus infection in mice. *Int. Immunopharmacol.* **2011**, *11*, 2246–2250, doi:10.1016/j.intimp.2011.09.012.
- 587 34. Maeda, N.; Nakamura, R.; Hirose, Y.; Murosaki, S.; Yamamoto, Y.; Kase, T.; Yoshikai, Y. Oral
- 588 administration of heat-killed *Lactobacillus plantarum* L-137 enhances protection against influenza virus
- 589 infection by stimulation of type I interferon production in mice. *Int. Immunopharmacol.* **2009**, *9*, 1122–
- 590 1125, doi:10.1016/J.INTIMP.2009.04.015.
- 591 35. Cillóniz, C.; Shinya, K.; Peng, X.; Korth, M. J.; Proll, S. C.; Aicher, L. D.; Carter, V. S.; Chang, J. H.; Kobasa,
- 592 D.; Feldmann, F.; Strong, J. E.; Feldmann, H.; Kawaoka, Y.; Katze, M. G. Lethal influenza virus infection
- 593 in macaques is associated with early dysregulation of inflammatory related genes. *PLoS Pathog.* **2009**, *5*,
- 594 e1000604, doi:10.1371/journal.ppat.1000604.
- 595 36. Kobasa, D.; Jones, S. M.; Shinya, K.; Kash, J. C.; Copps, J.; Ebihara, H.; Hatta, Y.; Kim, J. H.; Halfmann,
- 596 P.; Hatta, M.; Feldmann, F.; Alimonti, J. B.; Fernando, L.; Li, Y.; Katze, M. G.; Feldmann, H.; Kawaoka,
- 597 Y. Aberrant innate immune response in lethal infection of macaques with the 1918 influenza virus.
- 598 *Nature* **2007**, *445*, 319–323, doi:10.1038/nature05495.
- 599 37. Pawelek, K. A.; Huynh, G. T.; Quinlivan, M.; Cullinane, A.; Rong, L.; Perelson, A. S. Modeling within-
- 600 host dynamics of influenza virus infection including immune responses. *PLoS Comput. Biol.* **2012**, *8*,
- 601 e1002588, doi:10.1371/journal.pcbi.1002588.
- 602 38. Saenz, R. A.; Quinlivan, M.; Elton, D.; Macrae, S.; Blunden, A. S.; Mumford, J. A.; Daly, J. M.; Digard, P.;
- 603 Cullinane, A.; Grenfell, B. T.; McCauley, J. W.; Wood, J. L. N.; Gog, J. R. Dynamics of influenza virus
- 604 infection and pathology. *J. Virol.* **2010**, *84*, 3974–83, doi:10.1128/JVI.02078-09.
- 605 39. Hancioglu, B.; Swigon, D.; Clermont, G. A dynamical model of human immune response to influenza A
- 606 virus infection. *J. Theor. Biol.* **2007**, *246*, 70–86, doi:10.1016/j.jtbi.2006.12.015.
- 607 40. Baccam, P.; Beauchemin, C.; Macken, C. A.; Hayden, F. G.; Perelson, A. S. Kinetics of influenza A virus
- 608 infection in humans. *J. Virol.* **2006**, *80*, 7590–9, doi:10.1128/JVI.01623-05.
- 609 41. Handel, A.; Longini, I. M.; Antia, R. Towards a quantitative understanding of the within-host dynamics
- 610 of influenza A infections. *J. R. Soc. Interface* **2010**, *7*, 35–47, doi:10.1098/rsif.2009.0067.
- 611 42. Bocharov, G. A.; Romanyukha, A. A. Numerical treatment of the parameter identification problem for
- 612 delay-differential systems arising in immune response modelling. *Appl. Numer. Math.* **1994**, *15*, 307–326,
- 613 doi:10.1016/0168-9274(94)00007-7.
- 614 43. Price, I.; Mochan-Keef, E. D.; Swigon, D.; Ermentrout, G. B.; Lukens, S.; Toapanta, F. R.; Ross, T. M.;
- 615 Clermont, G. The inflammatory response to influenza A virus (H1N1): An experimental and
- 616 mathematical study. *J. Theor. Biol.* **2015**, *374*, 83–93, doi:10.1016/j.jtbi.2015.03.017.
- 617 44. Bocharov, G. A.; Romanyukha, A. A. Mathematical Model of Antiviral Immune Response III. Influenza
- 618 A Virus Infection. *J Theor Biol* **1994**, *167*, 323–360.

- 619 45. Nagaraja, S.; Wallqvist, A.; Reifman, J.; Mitrophanov, A. Y. Computational Approach To Characterize  
620 Causative Factors and Molecular Indicators of Chronic Wound Inflammation. *J. Immunol.* **2014**, *192*,  
621 1824–1834, doi:10.4049/jimmunol.1302481.
- 622 46. Mifsud, E. J.; Tan, A. C. L.; Jackson, D. C. TLR Agonists as Modulators of the Innate Immune Response  
623 and Their Potential as Agents Against Infectious Disease. *Front. Immunol.* **2014**, *5*, 79,  
624 doi:10.3389/fimmu.2014.00079.
- 625 47. Tan, A. C. L.; Mifsud, E. J.; Zeng, W.; Edenborough, K.; McVernon, J.; Brown, L. E.; Jackson, D. C.  
626 Intranasal administration of the TLR2 agonist pam2Cys provides rapid protection against influenza in  
627 mice. *Mol. Pharm.* **2012**, *9*, 2710–2718, doi:10.1021/mp300257x.
- 628 48. Wong, J. P.; Christopher, M. E.; Viswanathan, S.; Karpoff, N.; Dai, X.; Das, D.; Sun, L. Q.; Wang, M.;  
629 Salazar, A. M. Activation of toll-like receptor signaling pathway for protection against influenza virus  
630 infection. *Vaccine* **2009**, *27*, 3481–3483, doi:10.1016/j.vaccine.2009.01.048.
- 631 49. Lau, Y. F.; Tang, L. H.; Ooi, E. E.; Subbarao, K. Activation of the innate immune system provides broad-  
632 spectrum protection against influenza A viruses with pandemic potential in mice. *Virology* **2010**, *406*, 80–  
633 87, doi:10.1016/j.virol.2010.07.008.
- 634 50. Biron, C. A. Role of early cytokines, including alpha and beta interferons (IFN-alpha/beta), in innate and  
635 adaptive immune responses to viral infections. *Semin. Immunol.* **1998**, *10*, 383–390,  
636 doi:10.1006/smim.1998.0138.
- 637 51. García-Sastre, A.; Durbin, R. K.; Zheng, H.; Palese, P.; Gertner, R.; Levy, D. E.; Durbin, J. E. The role of  
638 interferon in influenza virus tissue tropism. *J. Virol.* **1998**, *72*, 8550–8558.
- 639 52. Stark, G. R.; Kerr, I. M.; Williams, B. R.; Silverman, R. H.; Schreiber, R. D. How cells respond to  
640 interferons. *Annu. Rev. Biochem.* **1998**, *67*, 227–264.
- 641 53. van Boxel-Dezaire, A. H. H.; Rani, M. R. S.; Stark, G. R. Complex modulation of cell type-specific  
642 signaling in response to type I interferons. *Immunity* **2006**, *25*, 361–372.
- 643 54. Dobrovolny, H. M.; Reddy, M. B.; Kamal, M. a; Rayner, C. R.; Beauchemin, C. a a Assessing mathematical  
644 models of influenza infections using features of the immune response. *PLoS One* **2013**, *8*, e57088,  
645 doi:10.1371/journal.pone.0057088.
- 646 55. Fensterl, V.; Sen, G. C. Interferons and viral infections. *Biofactors* **2009**, *35*, 14–20, doi:10.1002/biof.6.
- 647 56. Pestka, S.; Krause, C. D.; Walter, M. R. Interferons, interferon-like cytokines, and their receptors.  
648 *Immunol. Rev.* **2004**, *202*, 8–32.
- 649 57. Flammer, J. R.; Dobrovolna, J.; Kennedy, M. A.; Chinenov, Y.; Glass, C. K.; Ivashkiv, L. B.; Rogatsky, I.  
650 The Type I Interferon Signaling Pathway Is a Target for Glucocorticoid Inhibition □. *Mol. Cell. Biol.* **2010**,  
651 *30*, 4564–4574, doi:10.1128/MCB.00146-10.
- 652 58. Kandun, I. N.; Wibisono, H.; Sedyaningsih, E. R.; Yusharmen, D. P. H.; Hadisoedarsuno, W.; Purba, W.;  
653 Santoso, H.; Septiawati, C.; Tresnaningsih, E. Three Indonesian clusters of H5N1 virus infection in 2005.  
654 *N Engl J Med* **2006**, *355*, 2186–2194.
- 655 59. Yuen, K. Y.; Chan, P. K. S.; Peiris, M.; Tsang, D. N. C.; Que, T. L.; Shortridge, K. F.; Cheung, P. T.; To, W.  
656 K.; Ho, E. T. F. Clinical features and rapid viral diagnosis of huamn disease associated with avian  
657 influenza A H5N1 virus. *Lancet* **1998**, *351*, 467–471.
- 658 60. Hien, T. T.; Liem, N. T.; Dung, N. T.; San, L. T.; Mai, P. P.; Chau, N. van V.; Suu, P. T.; Dong, V. C.; Mai,  
659 L. T. Q.; Thi, N. T.; Khoa, D. B.; Phat, L. P.; Truong, N. T.; Long, H. T.; Tung, C. V.; Giang, L. T.; Tho, N.  
660 D.; Nga, L. H.; Tien, N. T. K.; San, L. H.; Tuan, L. Van; Dolecek, C.; Thanh, T. T.; de Jong, M.; Schultsz,  
661 C.; Cheng, P.; Lim, W.; Horby, P.; Farrar, J.; World Health Organization International Avian Influenza

- 662 Investigative Team Avian Influenza A (H5N1) in 10 Patients in Vietnam. *N. Engl. J. Med.* **2004**, *350*, 1179–  
663 1188, doi:10.1056/NEJMoa040419.
- 664 61. Bernard, G. The International Sepsis Forum’s controversies in sepsis: corticosteroids should not be  
665 routinely used to treat septic shock. *Crit Care* **2002**, *6*, 3884–386.
- 666 62. Annane, D.; Bellissant, E.; Bollaert, P. E.; Briegel, J.; Keh, D.; Kupfer, Y. Corticosteroids for severe sepsis  
667 and septic shock: a systematic review and meta-analysis. *BMJ* **2004**, *329*, 480.
- 668 63. Stephen, E. L.; Sammons, M. L.; Pannier, W. L.; Baron, S.; Spertzel, R. O.; Levy, H. B. Effect of a nuclease-  
669 resistant derivative of polyriboinosinic-polyribocytidylic acid complex on yellow fever in rhesus  
670 monkeys (*Macaca mulatta*). *J Infect Dis* **1977**, *136*, 122–126, doi:10.1093/infdis/136.1.122.
- 671 64. Shinya, K.; Ito, M.; Makino, A.; Tanaka, M.; Miyake, K.; Eisfeld, A. J.; Kawaoka, Y. The TLR4-TRIF  
672 pathway protects against H5N1 influenza virus infection. *J. Virol.* **2011**, *86*, doi:10.1128/JVI.06168-11.
- 673 65. Seo, S. U.; Lee, K. H.; Byun, Y. H.; Kweon, M. N.; Seong, B. L. Immediate and broad-spectrum protection  
674 against heterologous and heterotypic lethal challenge in mice by live influenza vaccine. *Vaccine* **2007**, *25*,  
675 8067–8076, doi:10.1016/j.vaccine.2007.09.012.
- 676 66. Abe, T.; Takahashi, H.; Hamazaki, H.; Miyano-Kurosaki, N.; Matsuura, Y.; Takaku, H. Baculovirus  
677 Induces an Innate Immune Response and Confers Protection from Lethal Influenza Virus Infection in  
678 Mice. *J. Immunol.* **2003**, *171*, 1133–1139, doi:10.4049/jimmunol.171.3.1133.  
679



© 2018 by the authors. Submitted for possible open access publication under the terms and conditions of the Creative Commons Attribution (CC BY) license (<http://creativecommons.org/licenses/by/4.0/>).
